# Supplementary material
Source: MDPI journal article supplement (https://www.mdpi.com/2073-4441/13/24/3640)
Supplement: s1 [file s1]

# Supplementary file

## Assessment of Water Quality Based on Trophic Status and Nutrients-Chlorophyll Empirical Models of Different Elevation Reservoirs

Md Mamun, Usman Atique and Kwang-Guk An\*

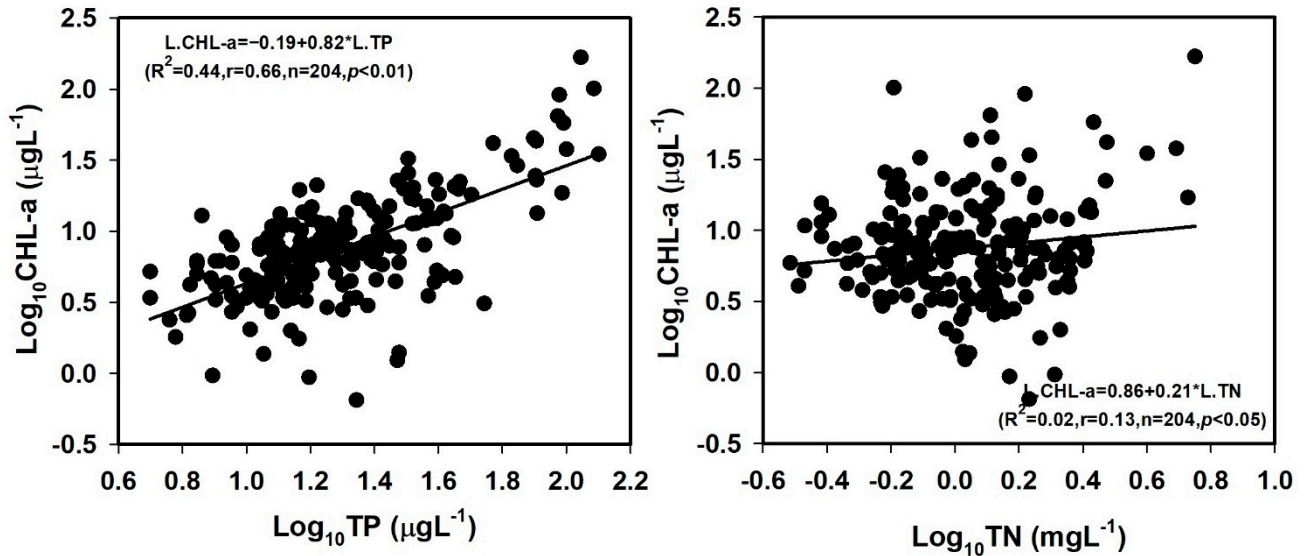

**Figure S1.** Empirical relations among nutrients (TP: total phosphorus, TN: total nitrogen) with chlorophyll-a (CHL-a)

**Table S1.** Trophic state criteria based on TP, TN, CHL-a, and SD from Nurnberg (1996) for high land (HLR), midland (MLR), lowland (LLR), and very low land (VLLR) reservoirs. (TN: total nitrogen, TP: total phosphorus, CHL-a: chlorophyll-a, SD: Secchi depth, O: oligotrophic, M: mesotrophic, E: eutrophic and H: Hypereutrophic).

| Variables                    | Trophic state |             |           |      | Mean values  |              |              |              |
|------------------------------|---------------|-------------|-----------|------|--------------|--------------|--------------|--------------|
|                              | O             | M           | E         | H    | HLR          | MLR          | LLR          | VLLR         |
| TP ( $\mu\text{g/L}$ )       | <10           | >10 - 30    | >30 - 100 | >100 | 14.41<br>(M) | 16.84<br>(M) | 20.32<br>(M) | 39.10<br>(E) |
| TN ( $\text{mg/L}$ )         | <0.75         | 0.75 - <1.5 | >1.5 - 3  | >3   | 1.45<br>(M)  | 1.25<br>(M)  | 1.12<br>(M)  | 1.33<br>(M)  |
| CHL-a<br>( $\mu\text{g/L}$ ) | <3.5          | 3.5 - <9    | >9 - 25   | >25  | 5.81<br>(M)  | 6.71<br>(M)  | 8.24<br>(M)  | 19.26<br>(E) |
| SD (m)                       | >4            | <4 - >2     | <2 - 1    | <1   | 2.48<br>(M)  | 2.55<br>(M)  | 1.91<br>(E)  | 1.61<br>(E)  |

**Table S2.** Thresholds of risk associated with potential growth of cyanobacteria in high land (HLR), midland (MLR), lowland (LLR), and very low land (VLLR) reservoirs (adopted from WHO, 2015, LRG: lower risk of growth, MRG: moderate risk of growth and HRG: higher risk of growth, TP: total phosphorus, CHL-a: chlorophyll-a, SD: Secchi depth)

| Variables       | Thresholds |          |      | Risk of cyanobacterial growth |                |                |                |
|-----------------|------------|----------|------|-------------------------------|----------------|----------------|----------------|
|                 | LRG        | MRG      | HRG  | HLR                           | MLR            | LLR            | VLLR           |
| TP (µg/L)       | <10 - 25   | 25 - 100 | >100 | 14.41<br>(LRG)                | 16.84<br>(LRG) | 20.32<br>(LRE) | 39.10<br>(MRG) |
| CHL-a<br>(µg/L) | <10        | 10 - 50  | >50  | 5.81<br>(LRG)                 | 6.71<br>(LRG)  | 8.24<br>(LRE)  | 19.26<br>(MRG) |
| SD (m)          | >2         | <2 - 1   | <1   | 2.48<br>(LRG)                 | 2.55<br>(LRG)  | 1.91<br>(MRE)  | 1.61<br>(MRG)  |
